# Supplementary material for: Crystal structure and up- and down-conversion properties of Yb3+, Ho3+ codoped BaGdF5 solid-solution with different morphologies
Source: Royal Society of Chemistry journal article supplement (doi:10.1039/c2ce06616e), 2012-01-01
Supplement: c2ce06616e.pdf [file c2ce06616e.pdf]

**Supporting information**

**Crystal structure and up- and down-conversion properties of Yb<sup>3+</sup>, Ho<sup>3+</sup> codoped BaGdF<sub>5</sub>  
solid-solution with different morphologies**

**Linna Guo, Yanzhao Wang, Yuhua Wang\*, Jia Zhang and Pengyu Dong**

*Department of Materials Science, School of Physical Science and Technology, Lanzhou University,  
Lanzhou, 730000, China.*

\* Corresponding author. Tel.: +86 931 8912772.

Fax: +86 931 8913554.

E-mail address: wyh@lzu.edu.cn. (Y.H. Wang).

### SEM of BaGdF<sub>5</sub> samples with different hydrothermal time using PVP as dispersing agent

SEM images of the corresponding intermediates prepared at the same hydrothermal temperature (180 °C) are shown in Figure S1. It is found that when the reaction time reaches 5 h, the tiny BaGdF<sub>5</sub> octahedron nuclei form at the first stage. With the reaction time up to 10 h, the octahedron particles begin to agglomerate. After 15 h of growth, incomplete primary peanut structure appears. Then, along with the increase of reaction time up to 24 h, these formed octahedron particles served as primary nanobuilding units assemble and arrange in a three dimensional array to form eventually uniform peanut-like microcrystals. Additionally, there also exist some octahedron particles, but the dominant morphology of the products is nearly complete peanut microcrystal. Hence, we agree with the reviewer's suggestion and the corresponding discussion has been added in the supporting information of our revised manuscript.

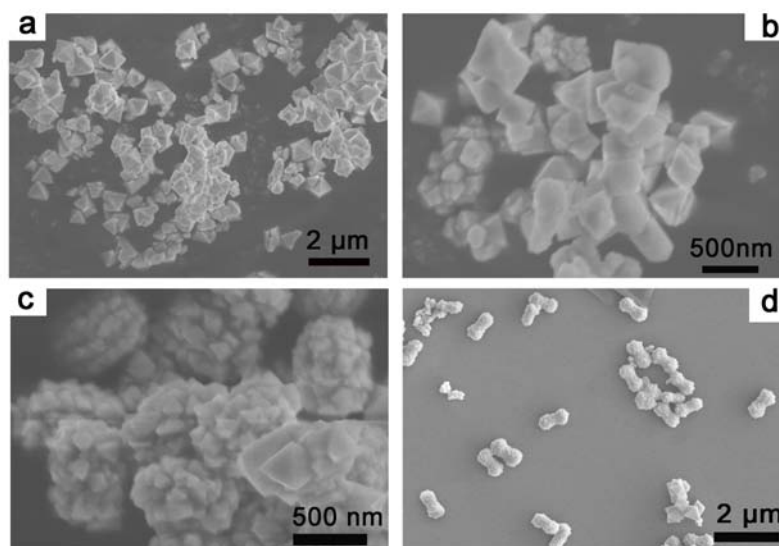

Figure S1 SEM images of a series of BaGdF<sub>5</sub> samples with different hydrothermal time: (a) 5 h, (b) 10 h, (c) 15 h and (d) 24 h
